# Supplementary material
Source: publisher site journal article supplement (https://www.dovepress.com/article/536082)
Supplement: Supplementary file 1 [file Table%20S1_2_1_1.doc]

**Table S1** Odds Ratio (95% CI) for Life’s Essential 8 component metrics associated with GDM history in NHANES 2007–2018

| Component | OR (95%CI) | *P* value |
| --- | --- | --- |
| Diet |  |  |
| Low CVH [0,50) | Ref |  |
| Moderate CVH [50,80) | 0.86(0.72,1.03) | 0.096 |
| High CVH [80,100] | 0.91(0.76,1.08) | 0.276 |
| Physical activity |  |  |
| Low CVH | Ref |  |
| Moderate CVH | 0.82(0.56,1.17) | 0.303 |
| High CVH | 0.94(0.81,1.10) | 0.426 |
| Nicotine exposure |  |  |
| Low CVH | Ref |  |
| Moderate CVH | 1.10(0.86,1.40) | 0.443 |
| High CVH | 1.00(0.83,1.22) | 0.972 |
| Sleep health |  |  |
| Low CVH | Ref |  |
| Moderate CVH | 0.86(0.68,1.08) | 0.181 |
| High CVH | 0.94(0.78,1.14) | 0.513 |
| BMI |  |  |
| Low CVH | Ref |  |
| Moderate CVH | 0.66(0.56,0.78) | <0.001 |
| High CVH | 0.40(0.32,0.49) | <0.001 |
| Blood lipids |  |  |
| Low CVH | Ref |  |
| Moderate CVH | 0.92(0.76,1.11) | 0.367 |
| High CVH | 0.75(0.64,0.90) | 0.001 |
| Blood pressure |  |  |
| Low CVH | Ref |  |
| Moderate CVH | 0.96(0.78,1.19) | 0.738 |
| High CVH | 0.74(0.59,0.92) | <0.001 |

Model adjusted for age, race, education, PIR, health insurance, and access to healthcare.
